# Supplementary material for: Fouling-free ultrafiltration for humic acid removal
Source: Royal Society of Chemistry journal article supplement (doi:10.1039/c8ra03810d), 2018-01-01
Supplement: c8ra03810d1.pdf [file c8ra03810d1.pdf]

1

## Supporting Information

2

### **Fouling-free ultrafiltration for humic acid removal**

3 Hassan Younas,<sup>a,b</sup> Jiahui Shao,<sup>a†</sup> Yiliang He,<sup>a</sup> Gul Fatima,<sup>c</sup> Syed Taseer Abbas Jaffar,<sup>d</sup> and Zohaib Ur Rehman Afridi<sup>e</sup>

4 <sup>a</sup> *School of Environmental Science and Engineering, Shanghai Jiao Tong University, Shanghai 200240, China*

5 <sup>b</sup> *The state key laboratory of Materials Oriented Separations, College of Chemical Engineering, Nanjing Tech*  
6 *University, Nanjing 210009, China*

7 <sup>c</sup> *Department of Chemistry and Chemical Engineering, Syed Ali Babar School of Science and Engineering, Lahore*  
8 *University of Management Sciences, Lahore 54000, Pakistan*

9 <sup>d</sup> *Department of Civil Engineering, Shanghai Jiao Tong University, Shanghai 200240, China*

10 <sup>e</sup> *Energy Management and Sustainability, U.S. Pakistan Centre For Advanced Studies in Energy, University of*  
11 *Engineering and Technology Peshawar, Peshawar, Pakistan*

12 †E. mail: [jhshao@sjtu.edu.cn](mailto:jhshao@sjtu.edu.cn), Tel: +86-21-54742127

13

14

15

## 1 Surface characteristics of the membrane

2 Scanning electron microscopy (SEM) and energy dispersive X-ray spectroscopy (EDX) of  
3 the membrane was performed to make sure that  $\text{TiO}_2$  NPs were immobilized on the surface of the  
4 membrane. The results are shown in Fig. S1. Fig S1a shows the SEM image of the membrane with  
5  $3.04 \text{ g m}^{-2}$   $\text{TiO}_2$  NPs distribution on the membrane. It was found that the whole surface of the  
6 membrane was covered by  $\text{TiO}_2$  NPs that certified the successful immobilization of  $\text{TiO}_2$  NPs on  
7 the membrane. Fig. S1b shows the EDX mapping of the membrane surface for elemental Ti. EDX  
8 mapping also confirm that the particles in SEM image are of  $\text{TiO}_2$  that are well spread and  
9 immobilized on the membrane surface.

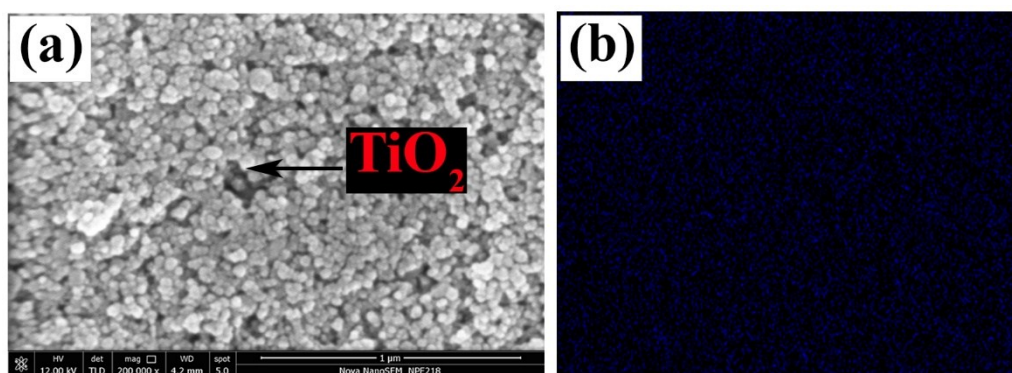

10  
11 **Fig. S 1.** Surface of the membrane with  $3.04 \text{ g m}^{-2}$   $\text{TiO}_2$  distribution, (a) SEM image of the surface of the membrane, (b) EDS  
12 mapping of elemental Ti of the surface of the membrane

## 14 Stability of $\text{TiO}_2$ NPs attachment

15 Fig. S2 shows the results of stability of  $\text{TiO}_2$  NPs attachment on the surface of the  
16 membrane. A simple yet significant test was performed to assess the attachment stability of the  
17 membrane. Cross-flow UF was performed with pure water while adjusting the pressure as 0.1 MPa  
18 and cross-flow rate as  $0.5 \text{ L min}^{-1}$ . The turbidity of the water in feed was measured before starting  
19 the filtration test and after finishing the filtration test. Whereas, turbidity of permeate was regularly  
20 measured for 24 h. The turbidity of feed was higher before starting the filtration test than the

1 turbidity of the feed after finishing the filtration test. The low turbidity of the feed after finishing  
2 the filtration test assured that  $\text{TiO}_2$  NPs were firmly attached on the membrane surface and were  
3 not detached by the cross-flow pressure over the membrane. The turbidity of permeate remained  
4 lower than feed throughout the filtration test, which assured that  $\text{TiO}_2$  NPs were not leached out  
5 of the membrane.

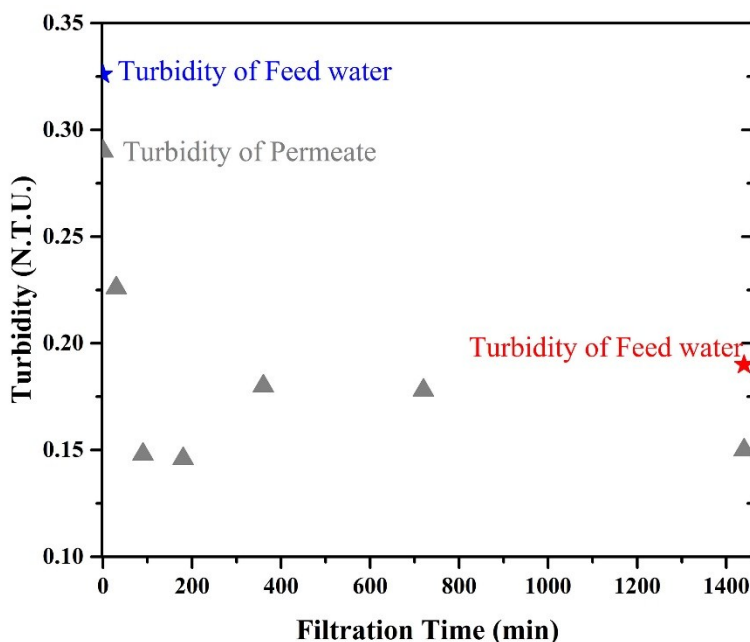

6

7

Fig. S 2. Test for the stability of  $\text{TiO}_2$  NPs attachment on the surface of the membrane.

8

### 9 Pore size analysis

10 Fig. S3 shows the pore size distribution of the membranes. It was found that the average pore size  
11 of the membrane without  $\text{TiO}_2$  NPs was 35 nm (Fig. S3a). Whereas, the average pore size of the  
12 membrane with  $\text{TiO}_2$  NPs in membrane matrix and on surface of the membrane was 65 nm (Fig.  
13 S3b).

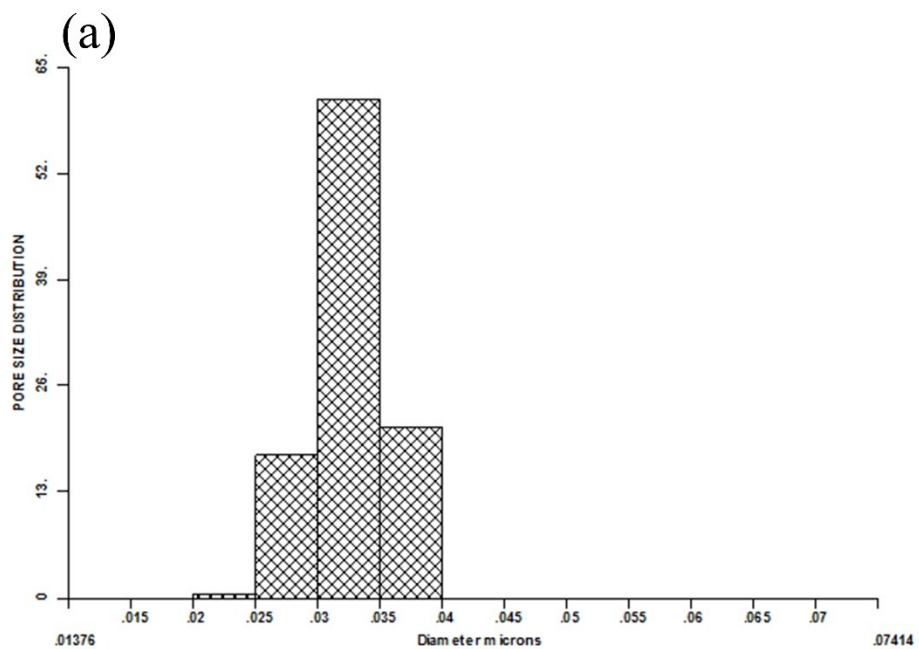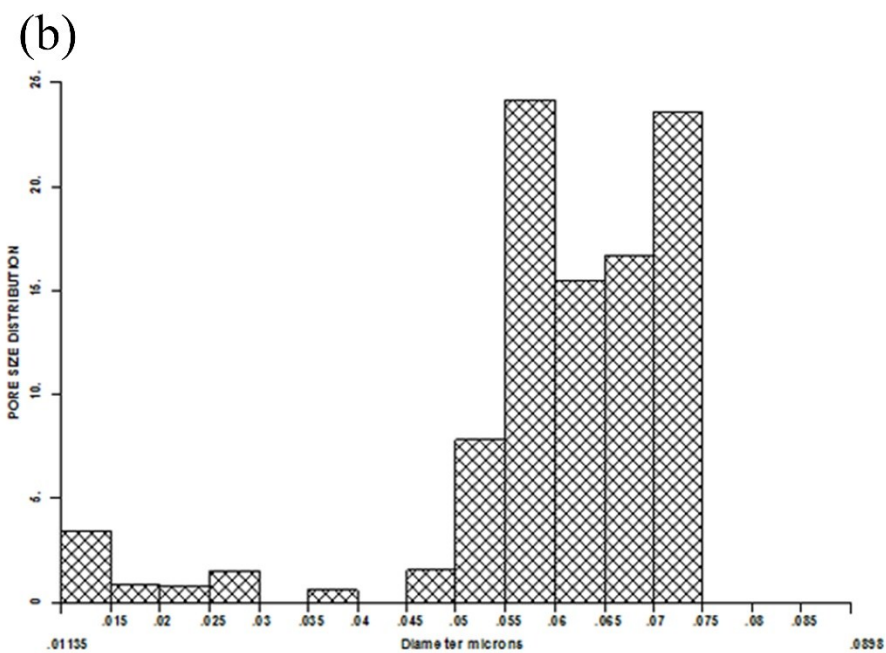

1  
2  
3  
4

**Fig. S 3.** Pore size analysis of the membranes, (a) membrane without TiO<sub>2</sub> NPs; (b) membrane with TiO<sub>2</sub> NPs (TiO<sub>2</sub> inside membrane matrix= 1.5%, TiO<sub>2</sub> NPs distribution on membrane surface = 3.04 g m<sup>-2</sup>)
